# Supplementary material
Source: PubMed Central journal article supplement (PMC3646979)
Supplement: NIHMS463439-supplement-01.pdf [file NIHMS463439-supplement-01.pdf]

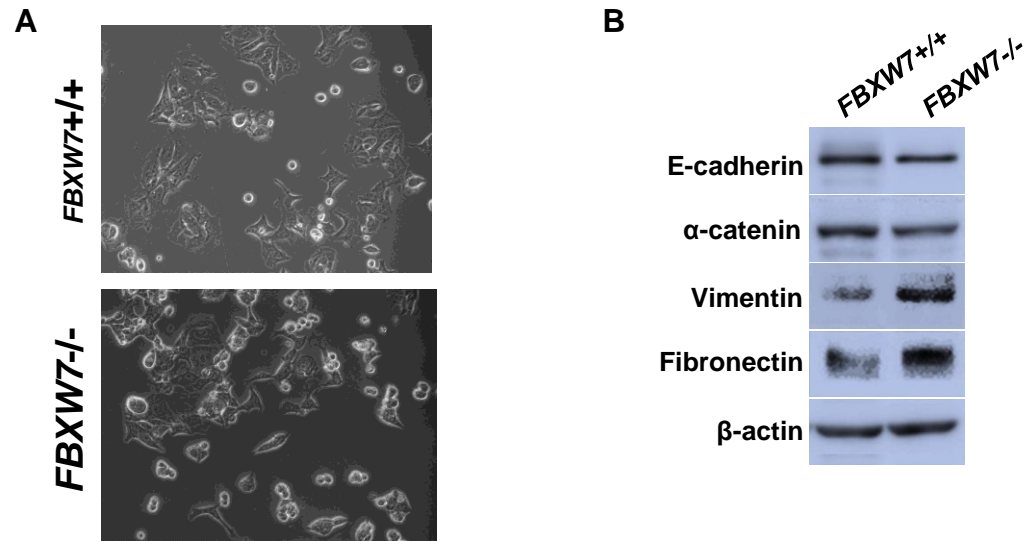

**Supplemental Figure 1.** Depletion of *FBXW7* in DLD-1 cells leads to epithelial-mesenchymal transition. **(A)** Morphology comparison of DLD-1 *FBXW7*<sup>-/-</sup> and its control cells under bright field. **(B)** Western blot analysis of indicated EMT marker in DLD-1 *FBXW7*<sup>-/-</sup> and its control cells.

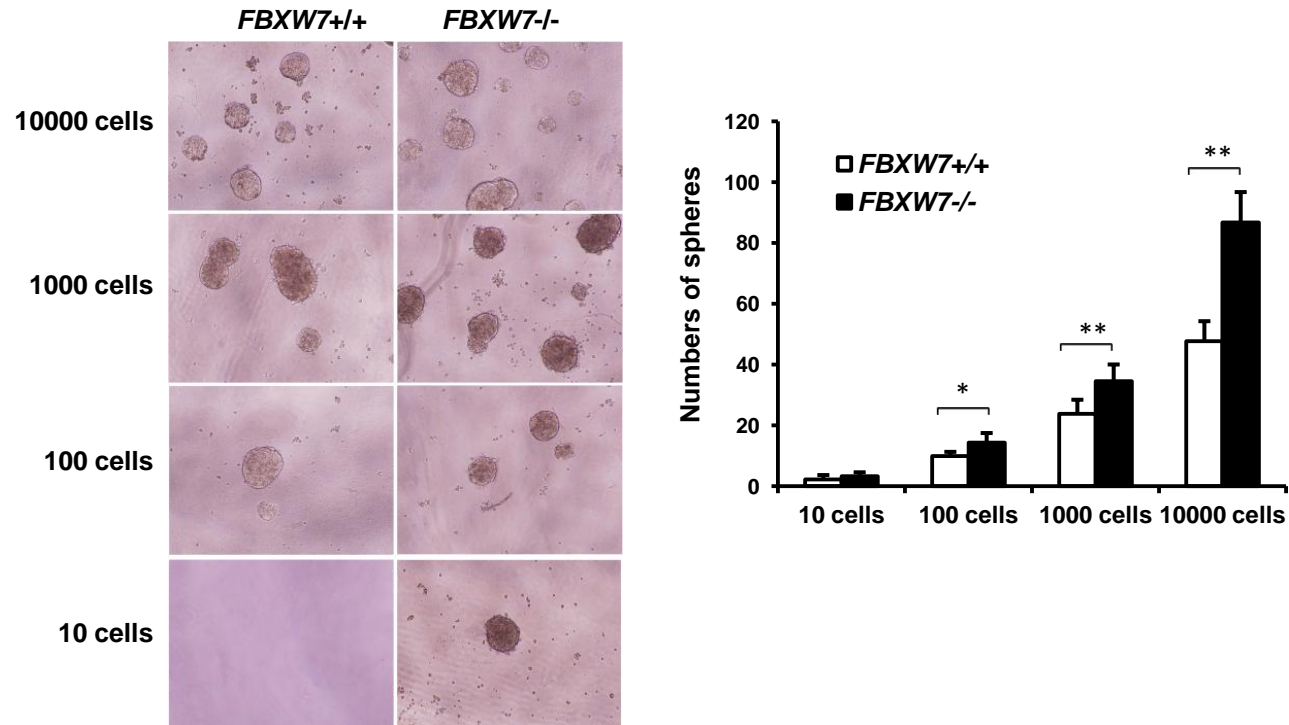

**Supplemental Figure 2.** Number of spheres was quantified using sphere formation assay for DLD-1 *FBXW7*<sup>-/-</sup> and its control cells; left panels showed representative spheres. Data were presented as means  $\pm$  Standard deviation from three independent experiments in triplicates. \* $P < 0.05$  and \*\* $P < 0.01$  were obtained from Student's t-test.

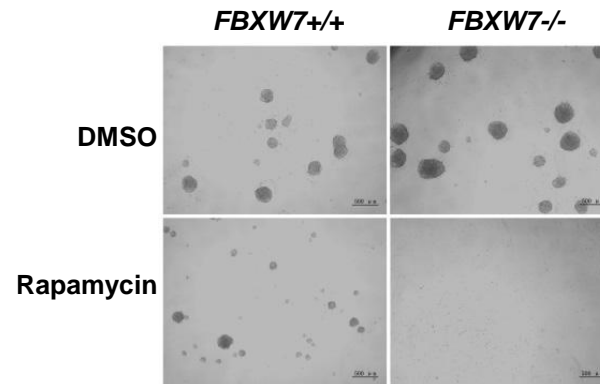

**Supplemental Figure 3.** Representative sphere formation of HCT116 *FBXW7*<sup>-/-</sup> and its control cells treated with DMSO or rapamycin.
